# Supplementary material
Source: ML conference proceedings conference paper supplement (https://proceedings.neurips.cc/paper_files/paper/2019/hash/702cafa3bb4c9c86e4a3b6834b45aedd-Abstract.html)
Supplement: Supplementary file [file 702cafa3bb4c9c86e4a3b6834b45aedd-Supplemental.zip]

## Appendix: Proofs

*Proof of Theorem 1.* To state the proof of the theorem, we need to define more notations. For a generic set  $A \subset [0, 1]^p$ , with slight abuse of notations, let  $N_n(A) = \sum_i \mathbb{1}(\mathbf{x}_i \in A)$  be the number of samples with input features in  $A$ , and

$$\mu_n(A) = \frac{\sum_{\mathbf{x}_i \in A} y_i}{N_n(A)}$$

be the average response of those samples. For any feature  $X_k$  and  $z \in (0, 1)$ , let  $\Delta_{\mathcal{I}}(A, (k, z))$  be the impurity decrease when splitting  $A$  into  $A \cap \{X_k \leq z\}$  and  $A \cap \{z < X_k\}$ , and  $\Delta_{\mathcal{I}}(A, k) = \sup_{0 \leq z \leq 1} \Delta_{\mathcal{I}}(A, (k, z))$ .

The proof of the theorem proceeds in three parts. First, we prove a lemma which gives a tail bound for  $\Delta_{\mathcal{I}}(A, k)$ . Second, we use the lemma and union bound to derive the upper bound for the expectation of  $G_0(T)$ . Finally, we use a separate argument based on Gaussian comparison inequalities to obtain the lower bound.

**Lemma 1.** *For any axis-aligned hyper-rectangle  $A \subset [0, 1]^p$ ,  $k \notin S$  and  $\delta > 0$ , we have*

$$\mathbb{P}_{X, \epsilon}(\Delta_{\mathcal{I}}(A, k) \geq \delta | N_n(A)) \leq 4N_n(A)e^{-\frac{\delta N_n(A)}{4(M+1)^2}}.$$

*Proof of Lemma 1.* We suppose without loss of generality that  $\mathbf{x}_1, \dots, \mathbf{x}_{N_n(A)} \in A$ . For any  $z \in [0, 1]$ , we let

$$A^{\text{left}} = A \cap \{0 \leq X_k \leq z\}, \quad A^{\text{right}} = A \cap \{z < X_k \leq 1\},$$

and introduce the shorthands

$$p^{\text{left}} = \frac{N_n(A^{\text{left}})}{N_n(A)}, \quad p^{\text{right}} = \frac{N_n(A^{\text{right}})}{N_n(A)}, \quad \mu^{\text{left}} = \mu_n(A^{\text{left}}), \quad \mu^{\text{right}} = \mu_n(A^{\text{right}}).$$

Then

$$\begin{aligned} \Delta_{\mathcal{I}}(A, (k, z)) &= \frac{1}{N_n(A)} \sum_{\mathbf{x}_i \in A} (y_i - \mu_n(A))^2 - \frac{1}{N_n(A)} \sum_{\mathbf{x}_i \in A} (y_i - \mu_n(A^{\text{left}}))^2 \mathbb{1}(x_{ik} \leq z) \\ &\quad - \frac{1}{N_n(A)} \sum_{\mathbf{x}_i \in A} (y_i - \mu_n(A^{\text{right}}))^2 \mathbb{1}(x_{ik} > z) \\ &= \frac{1}{N_n(A)} \sum_{\mathbf{x}_i \in A} y_i^2 - \mu_n(A)^2 - p^{\text{left}} \left( \frac{1}{N_n(A)p^{\text{left}}} \sum_{\mathbf{x}_i \in A} y_i^2 \mathbb{1}(x_{ik} \leq z) - (\mu^{\text{left}})^2 \right) \\ &\quad - p^{\text{right}} \left( \frac{1}{N_n(A)p^{\text{right}}} \sum_{\mathbf{x}_i \in A} y_i^2 \mathbb{1}(x_{ik} > z) - (\mu^{\text{right}})^2 \right) \\ &= p^{\text{left}}(\mu^{\text{left}})^2 + p^{\text{right}}(\mu^{\text{right}})^2 - \mu_n(A)^2 \\ &= (p^{\text{left}}(\mu^{\text{left}})^2 + p^{\text{right}}(\mu^{\text{right}})^2)(p^{\text{left}} + p^{\text{right}}) - (p^{\text{left}}\mu^{\text{left}} + p^{\text{right}}\mu^{\text{right}})^2 \\ &= p^{\text{left}}p^{\text{right}}(\mu^{\text{left}} - \mu^{\text{right}})^2 \\ &\leq 2p^{\text{left}}p^{\text{right}}[(\mu^{\text{left}} - \mu)^2 + (\mu^{\text{right}} - \mu)^2] \\ &\leq 2p^{\text{left}}(\mu^{\text{left}} - \mu)^2 + 2p^{\text{right}}(\mu^{\text{right}} - \mu)^2, \end{aligned}$$

where

$$\mu = \mathbb{E}[Y|X \in A] = \mathbb{E}[\phi(X)|X \in A].$$

Now suppose without loss of generality that  $x_{1k} < x_{2k} < \dots < x_{n_k}$  (otherwise we can reorder the samples by  $X_k$ ). Since  $k \notin S$ ,  $X_k$  is independent of  $X_S$  and therefore independent of  $Y$ . Thus the distribution of  $(y_1, \dots, y_n)$  does not change after the reordering, i.e.,

$$y_i \stackrel{i.i.d.}{\sim} (\phi(X)|X \in A) + \epsilon.$$

Note that

$$\sup_z p^{\text{left}}(\mu^{\text{left}} - \mu)^2 \leq \sup_{1 \leq m \leq N_n(A)} \frac{m}{N_n(A)} \left( \frac{1}{m} \sum_{i=1}^m y_i - \mu \right)^2.$$

Note that  $Y$  is sub-Gaussian with parameter  $M + 1$ . Therefore, for each  $1 \leq m \leq N_n(A)$ , by Hoeffding bound,

$$\mathbb{P} \left( \frac{m}{N_n(A)} \left( \frac{1}{m} \sum_{i=1}^m y_i - \mu \right)^2 \geq \delta \middle| N_n(A) \right) \leq 2e^{-(M+1)^2 \delta N_n(A)^2 / m} \leq 2e^{-\frac{\delta N_n(A)}{(M+1)^2}}.$$

Therefore

$$\mathbb{P} \left( \sup_z p^{\text{left}}(\mu^{\text{left}} - \mu)^2 \geq \delta \middle| N_n(A) \right) \leq 2N_n(A)e^{-\frac{\delta N_n(A)}{(M+1)^2}}.$$

By symmetry, the same bound holds for  $p^{\text{right}}(\mu^{\text{right}} - \mu)^2$ . Therefore

$$\begin{aligned} & \mathbb{P}(\Delta_{\mathcal{I}}(A, k) \geq \delta \middle| N_n(A)) \\ & \leq \mathbb{P} \left( \sup_z p^{\text{left}}(\mu^{\text{left}} - \mu)^2 \geq \delta/2 \middle| N_n(A) \right) + \mathbb{P} \left( \sup_z p^{\text{right}}(\mu^{\text{right}} - \mu)^2 \geq \delta/2 \middle| N_n(A) \right) \\ & \leq 4N_n(A)e^{-\frac{\delta N_n(A)}{4(M+1)^2}}, \end{aligned}$$

and the lemma is proved.  $\square$

### Proof of the upper bound in Theorem 1

Without loss of generality, assume that when we split on feature  $k$ , the cut is always performed along the direction of  $k$  at some data point (and that data point falls into the right sub-tree). Suppose that  $\epsilon_i$  has unit variance for all  $i$ . Let  $C = 2 \max\{256, 16(M+1)^2\}$ . We also assume, without loss of generality, that  $m_n \geq 8d_n$ . Otherwise, since  $G_0(T)$  is, by definition, upper bounded by the sample variance of  $y$ , we have

$$\mathbb{E}_{X, \epsilon} \sup_{T \in \mathcal{T}_n(m_n, d_n)} G_0(T) \leq \text{Var}(Y) \leq M^2 + 1 \leq 16(M+1)^2 \frac{d_n \log np}{m_n}.$$

To simplify notation, we define  $\mathbf{x}_{n+1} = (0, \dots, 0)$  and  $\mathbf{x}_{n+2} = (1, \dots, 1)$ . For any  $V \subset [p]$ ,  $\mathcal{L}, \mathcal{R} \in [n+2]^{|V|}$ , let

$$A(V, \mathcal{L}, \mathcal{R}) = \{X = (X_1, \dots, X_p) : x_{\mathcal{L}_i, V_i} \leq X_{V_i} < x_{\mathcal{R}_i, V_i}, 1 \leq i \leq |V|, 0 \leq X_k \leq 1, k \notin V\}$$

be the random axis-aligned hyper-rectangle obtained by splitting on features in  $V$ , where the left and right endpoints of the  $i$ th feature  $V_i$  are determined by  $x_{\mathcal{L}_i, V_i}$  and  $x_{\mathcal{R}_i, V_i}$ . Note that in this definition, we treat  $\mathbf{x}_i$  as random variables rather than fixed, and  $A(V, \mathcal{L}, \mathcal{R})$  can be the empty set with non-zero probability. Let

$$A(V) = \{A(V, \mathcal{L}, \mathcal{R}) \mid \mathcal{L}, \mathcal{R} \in [n+2]^{|V|}\}$$

be all axis-aligned hyper-rectangles obtained by splitting on features in  $V$ . For any  $d \leq d_n$ , let

$$A_d = \cup_{|V|=d} A(V)$$

be the collection of all possible subsets of  $[0, 1]^p$  obtained by splitting on  $d$  features.

Fix  $\delta > \frac{96M^2 d_n}{m_n}$ . We will first show that

$$\begin{aligned} & \mathbb{P}_{X, \epsilon} \left( \exists A \in A_d, k \notin S : \Delta_{\mathcal{I}}(A, k) \geq \frac{m_n \delta}{N_n(A)} \text{ and } N_n(A) \geq m_n \right) \\ & \leq 5(np)^{d+1} \exp \left( -\frac{\delta m_n}{\max\{256, 16(M+1)^2\}} \right). \end{aligned} \tag{15}$$

Note that for any two events  $C_1$  and  $C_2$ , the inequality  $\mathbb{P}(C_1 \cap C_2) \leq \mathbb{P}(C_1 | C_2)$  always holds. Therefore, for any hyper-rectangle  $A$ , we have

$$\begin{aligned} & \mathbb{P}_{X, \epsilon} \left( \Delta_{\mathcal{I}}(A, k) \geq \frac{m_n \delta}{N_n(A)} \text{ and } N_n(A) \geq m_n \right) \\ & \leq \mathbb{P}_{X, \epsilon} \left( \Delta_{\mathcal{I}}(A, k) \geq \frac{m_n \delta}{N_n(A)} \middle| N_n(A) \geq m_n \right) \end{aligned} \tag{16}$$

To simplify notation, we will drop the conditional event  $N_n(A) \geq m_n$  in the remainder of the proof of the upper bound, unless stated otherwise.

Fix  $V \subset [p]$ ,  $\mathcal{L}, \mathcal{R} \in [n+2]^{|V|}$ , and  $k \notin S$ . Conditional on samples in  $\mathcal{L}$  and  $\mathcal{R}$ , we would like to apply Lemma 1 to  $A(V, \mathcal{L}, \mathcal{R})$  and  $k$ . The only problem is that there are now samples on the boundary of  $A(V, \mathcal{L}, \mathcal{R})$ , namely those in  $\mathcal{L}$  and  $\mathcal{R}$ . Let  $\mathbf{x}_{\mathcal{L}} = \{\mathbf{x}_i\}_{i \in \mathcal{L}}$  and  $\mathbf{x}_{\mathcal{R}} = \{\mathbf{x}_i\}_{i \in \mathcal{R}}$ . Conditional on  $\mathbf{x}_{\mathcal{L}}$ ,  $\mathbf{x}_{\mathcal{R}}$  and  $N_n(A(V, \mathcal{L}, \mathcal{R}))$ , and on the random variable  $X \in A(V, \mathcal{L}, \mathcal{R})$ ,  $X$  is uniformly distributed in  $A(V, \mathcal{L}, \mathcal{R})$ . For a set  $A$ , we let  $A^\circ$  be the interior of  $A$  and let  $\bar{A}$  be the boundary of  $A$ . Since  $m_n \geq 8d_n$ ,

$$\frac{N_n(A^\circ(V, \mathcal{L}, \mathcal{R}))}{N_n(A(V, \mathcal{L}, \mathcal{R}))} \geq \frac{m_n - 2d_n}{m_n} \geq \frac{3}{4}.$$

By Lemma 1, we have

$$\begin{aligned} & \mathbb{P}_{X, \epsilon} \left( \Delta_{\mathcal{I}}(A^\circ(V, \mathcal{L}, \mathcal{R}), k) \geq \frac{m_n \delta}{3N_n(A(V, \mathcal{L}, \mathcal{R}))} \middle| \mathbf{x}_{\mathcal{L}}, \mathbf{x}_{\mathcal{R}}, N_n(A(V, \mathcal{L}, \mathcal{R})) \right) \\ & \leq 4N_n(A^\circ(V, \mathcal{L}, \mathcal{R})) \exp \left( -\frac{\delta m_n N_n(A^\circ(V, \mathcal{L}, \mathcal{R}))}{12(M+1)^2 N_n(A(V, \mathcal{L}, \mathcal{R}))} \right) \\ & \leq 4n \exp \left( -\frac{\delta m_n}{16(M+1)^2} \right) \end{aligned} \quad (17)$$

for large  $n$ . Since the right hand side does not depend on  $\mathbf{x}_{\mathcal{L}}, \mathbf{x}_{\mathcal{R}}, N_n(A(V, \mathcal{L}, \mathcal{R}))$ , we can take expectation with respect to them, and obtain

$$\mathbb{P}_{X, \epsilon} \left( \Delta_{\mathcal{I}}(A^\circ(V, \mathcal{L}, \mathcal{R}), k) \geq \frac{m_n \delta}{3N_n(A(V, \mathcal{L}, \mathcal{R}))} \right) \leq 4n \exp \left( -\frac{\delta m_n}{16(M+1)^2} \right) \quad (18)$$

On the other hand, we have the inequality

$$\begin{aligned} \Delta_{\mathcal{I}}(A(V, \mathcal{L}, \mathcal{R}), k) & \leq \Delta_{\mathcal{I}}(A^\circ(V, \mathcal{L}, \mathcal{R}), k) + \frac{\sum_{i \in \mathcal{L}, \mathcal{R}} (y_i - \mu_n(A(V, \mathcal{L}, \mathcal{R})))^2}{N_n(A(V, \mathcal{L}, \mathcal{R}))} \\ & \leq \Delta_{\mathcal{I}}(A^\circ(V, \mathcal{L}, \mathcal{R}), k) + \frac{\sum_{i \in \mathcal{L}, \mathcal{R}} 2(y_i^2 + \mu_n(A(V, \mathcal{L}, \mathcal{R})))^2}{N_n(A(V, \mathcal{L}, \mathcal{R}))}. \end{aligned} \quad (19)$$

We have

$$\begin{aligned} & \mathbb{P}_{X, \epsilon} \left( \frac{\sum_{i \in \mathcal{L}, \mathcal{R}} 2y_i^2}{N_n(A(V, \mathcal{L}, \mathcal{R}))} \geq \frac{m_n \delta}{3N_n(A(V, \mathcal{L}, \mathcal{R}))} \right) \\ & \leq \mathbb{P} \left( \frac{\sum_{i \in \mathcal{L}, \mathcal{R}} 4(f^2(\mathbf{x}_i) + \epsilon_i^2)}{N_n(A(V, \mathcal{L}, \mathcal{R}))} \geq \frac{m_n \delta}{3N_n(A(V, \mathcal{L}, \mathcal{R}))} \right) \\ & \leq \mathbb{P} \left( \frac{\sum_{i \in \mathcal{L}, \mathcal{R}} 4(f^2(\mathbf{x}_i) + \epsilon_i^2)}{m_n} \geq \frac{\delta}{3} \right) \\ & \leq \mathbb{P} \left( \frac{\sum_{i \in \mathcal{L}, \mathcal{R}} 4M^2 + 4\epsilon_i^2}{m_n} \geq \frac{\delta}{3} \right) \\ & \leq \mathbb{P} \left( \frac{\sum_{i=1}^{2d_n} (\epsilon_i^2 - 1)}{m_n} \geq \frac{\delta}{16N_n(A^\circ(V, \mathcal{L}, \mathcal{R}))} \right) \leq \exp(-\frac{\delta m_n}{256}), \end{aligned} \quad (20)$$

for large  $n$ , where the fourth inequality holds because  $\delta \geq 96M^2 d_n / m_n$ , and the last inequality follows from the well-known tail bound

$$\mathbb{P} \left( \left| \frac{1}{d} \chi_d^2 - 1 \right| \geq \delta_0 \right) \leq 2e^{-d\delta_0^2/8}$$

for  $\chi_d^2$  random variable and  $\delta_0 < 1$ . To upper bound  $\mu_n(A(V, \mathcal{L}, \mathcal{R}))$ , note that

$$\begin{aligned}
& \mathbb{P} \left( \frac{\sum_{i \in \mathcal{L}, \mathcal{R}} 2\mu_n(A(V, \mathcal{L}, \mathcal{R}))^2}{N_n(A(V, \mathcal{L}, \mathcal{R}))} \geq \frac{m_n \delta}{3N_n(A(V, \mathcal{L}, \mathcal{R}))} \right) \\
& \leq \mathbb{P} \left( |\mu_n(A(V, \mathcal{L}, \mathcal{R}))| \geq \sqrt{\frac{\delta m_n}{6d_n}} \right) \\
& \leq \mathbb{P} \left( \left| \frac{1}{N_n(A(V, \mathcal{L}, \mathcal{R}))} \sum_{i=1}^{N_n(A(V, \mathcal{L}, \mathcal{R}))} \epsilon_i \right| \geq \sqrt{\frac{\delta m_n}{6d_n}} - M \right) \\
& \leq 2 \exp \left( -\frac{1}{2} m_n \left( \sqrt{\frac{\delta m_n}{6d_n}} - M \right)^2 \right) \\
& \leq 2 \exp \left( -\frac{\delta m_n}{4} \right),
\end{aligned} \tag{21}$$

where the last inequality follows from  $m_n \geq 8d_n$  and  $\delta \geq 96M^2 d_n / m_n$ . Combining Equations (18), (19), (21), we have

$$\mathbb{P}_{X, \epsilon} \left( \Delta_{\mathcal{I}}(A(V, \mathcal{L}, \mathcal{R}), k) \geq \frac{m_n \delta}{3N_n(A(V, \mathcal{L}, \mathcal{R}))} \right) \leq 5n \exp \left( -\frac{\delta m_n}{\max\{16(M+1)^2, 256\}} \right) \tag{22}$$

for any  $V \subset [p]$ ,  $|V| = d$ ,  $\mathcal{L}, \mathcal{R} \in [n+2]^{|V|}$ , and  $k \notin S$ . Note that the set  $A_d$  has cardinality

$$|A_d| = \binom{p}{d} (2(n+2))^d \leq \left( \frac{pn}{d} \right)^d$$

for large  $n$ . Therefore by union bound,

$$\begin{aligned}
\mathbb{P} \left( \exists A \in A_d, k \notin S : \Delta_{\mathcal{I}}(A, k) \geq \frac{m_n \delta}{N_n(A)} \right) & \leq 5np|A_d| \exp \left( -\frac{\delta m_n}{\max\{256, 16(M+1)^2\}} \right) \\
& \leq 5(np)^{d+1} \exp \left( -\frac{\delta m_n}{\max\{256, 16(M+1)^2\}} \right).
\end{aligned} \tag{23}$$

Suppose that  $\Delta_{\mathcal{I}}(A, k) \geq \frac{m_n \delta}{N_n(A)}$  for all  $A \in \cup_{d \leq d_n} A_d$  and  $k \notin S$ , then for any  $T \in T_n(m_n, d_n)$ ,

$$G_0(T) \leq \sum_{t: v(t) \notin S} \frac{N_n(t)}{n} \frac{m_n \delta}{N_n(t)} \leq \delta \frac{m_n |I(t)|}{n} \leq \delta,$$

where the last inequality follows since  $|I(t)| + 1$  is the total number of leaf nodes in  $T$ , and each leaf node contains at least  $m_n$  samples. Therefore

$$\begin{aligned}
\mathbb{P}_{X, \epsilon} \left( \sup_{T \in \mathcal{T}_n(m_n, d_n)} G_0(T) \geq \delta \right) & \leq \sum_{d=1}^{d_n} \mathbb{P} \left( \exists A \in A_d, k \notin S : \Delta_{\mathcal{I}}(A, k) \geq \frac{m_n \delta}{N_n(A)} \right) \\
& \leq \sum_{d=1}^{d_n} 5(np)^{d+1} \exp \left( -\frac{\delta m_n}{\max\{256, 16(M+1)^2\}} \right) \\
& \leq 10(np)^{d_n+1} \exp \left( -\frac{\delta m_n}{\max\{256, 16(M+1)^2\}} \right)
\end{aligned} \tag{24}$$

for any  $\delta > \frac{96M^2 d_n}{m_n}$ . Recall that  $C = 2 \max\{256, 16(M+1)^2\}$ . Note that  $\frac{C d_n \log(np)}{m_n} \geq \frac{96M^2 d_n}{m_n}$  for large  $n$ . Integrating over  $\delta$ , we have

$$\begin{aligned}
& \mathbb{E}_{X,\epsilon} \left[ \sup_{T \in \mathcal{T}_n(m_n, d_n)} G_0(T) \right] \\
& \leq \frac{3d_n \log(np)}{2m_n} + \mathbb{E}_{X,\epsilon} \left[ \sup_{T \in \mathcal{T}_n(m_n, d_n)} G_0(T) \mathbb{1}(\delta \geq \frac{3d_n \log(np)}{2m_n}) \right] \\
& \leq \frac{3d_n \log(np)}{2m_n} + \int_{\frac{3d_n \log(np)}{2m_n}}^{\infty} \mathbb{P}_{X,\epsilon} \left( \sup_{T \in \mathcal{T}_n(m_n, d_n)} G_0(T) \geq \delta \right) d\delta \\
& \leq \frac{C d_n \log(np)}{m_n}.
\end{aligned} \tag{25}$$

This completes the proof of the upper bound.

### Proof of the lower bound in Theorem 1

For the lower bound, let

$$d_n = \max\{d : 2^{d+1} m_n < n\}, \tag{26}$$

and consider a balanced, binary decision tree  $T$  constructed in the following way:

1. At each node on the first  $d_n - 1$  levels of the tree, we split on feature  $X_1$ , at the mid-point of  $X_1$ 's side of the rectangle corresponding to the node.
2. At each node on the  $d_n$ th level, we look at the remaining  $p - 1$  features, and split on the feature that maximizes the decrease in impurity.

In the following proof, we will lower bound  $G_0(T)$  by the sum of impurity reduction on the  $d_n$ th level alone. For  $t = 1, \dots, 2^{d_n-1}$ , let

$$R_t = \left\{ \frac{t-1}{2^{d_n-1}} \leq X_1 < \frac{t}{2^{d_n-1}} \right\}.$$

be the hyper-rectangle corresponding to the  $t$ th node on the  $d_n$ th level. Applying Chernoff's inequality, we have

$$\mathbb{P} \left( \left| \frac{N_n(R_t)}{n} - \frac{1}{2^{d_n-1}} \right| \geq \frac{1}{3 \cdot 2^{d_n-1}} \right) \leq 2 \exp \left( - \frac{n}{27 \cdot 2^{d_n-1}} \right).$$

Let

$$B_1 = \left\{ \left| \frac{N_n(R_t)}{n} - \frac{1}{2^{d_n-1}} \right| \leq \frac{1}{3 \cdot 2^{d_n-1}} \text{ for all } t \right\}$$

be the event that each node on the  $d_n$ th level contains at least  $\frac{2}{3} \frac{n}{2^{d_n-1}}$ , but no more than  $\frac{4}{3} \frac{n}{2^{d_n-1}}$  samples. Then

$$\mathbb{P}(B_1^c) \leq \sum_{t=1}^{2^{d_n-1}} \mathbb{P} \left( \left| \frac{N_n(R_t)}{n} - \frac{1}{2^{d_n-1}} \right| \geq \frac{1}{3 \cdot 2^{d_n-1}} \right) \leq 2^{d_n} \exp \left( - \frac{n}{27 \cdot 2^{d_n-1}} \right), \tag{27}$$

and conditional on  $B_1$ ,

$$\frac{8}{3} m_n \leq \frac{2}{3} \frac{n}{2^{d_n-1}} \leq N_n(R_t) \leq \frac{4}{3} \frac{n}{2^{d_n-1}} \leq \frac{32}{3} m_n. \tag{28}$$

We define

$$R_t^l(k) = R_t \cap \left\{ 0 \leq X_k < \frac{1}{2} \right\}$$

and

$$R_t^r(k) = R_t \cap \left\{ \frac{1}{2} \leq X_k < 1 \right\}$$

and use  $R_t^l, R_t^r$  as shorthand when  $k$  is fixed. For each  $t = 0, 1, \dots, 2^d - 1$ , by Equation

$$\Delta_{\mathcal{I}}(R_t, k) \geq \Delta_{\mathcal{I}}(R_t, (k, 1/2)) = \frac{N_n(R_t^l)}{N_n(R_t)} \frac{N_n(R_t^r)}{N_n(R_t)} (\mu_n(R_t^l) - \mu_n(R_t^r))^2$$

Let

$$\eta_k = \mu_n(R_t^l) - \mu_n(R_t^r)$$

Conditional on  $N_n(R_t^l)$  and  $N_n(R_t^r)$ ,  $\eta = (\eta_2, \dots, \eta_p)$  are jointly Gaussian with zero mean. To lower bound the impurity decrease at the  $t$ th node on the  $d_n$ th level, we use a Gaussian comparison argument to obtain a lower bound for  $\sup_k |\eta_k|$ , which requires us to calculate the covariance matrix of  $\eta$ . For any  $2 \leq k_1, k_2 \leq p$ , let us further define

$$\begin{aligned} R_t^{ll}(k_1, k_2) &= R_t \cap \left\{ 0 \leq X_{k_1} < \frac{1}{2} \right\} \cap \left\{ 0 \leq X_{k_2} < \frac{1}{2} \right\}; \\ R_t^{lr}(k_1, k_2) &= R_t \cap \left\{ 0 \leq X_{k_1} < \frac{1}{2} \right\} \cap \left\{ \frac{1}{2} \leq X_{k_2} < 1 \right\}; \\ R_t^{rl}(k_1, k_2) &= R_t \cap \left\{ \frac{1}{2} \leq X_{k_1} < 1 \right\} \cap \left\{ 0 \leq X_{k_2} < \frac{1}{2} \right\}; \\ R_t^{rr}(k_1, k_2) &= R_t \cap \left\{ \frac{1}{2} \leq X_{k_1} < 1 \right\} \cap \left\{ \frac{1}{2} \leq X_{k_2} < 1 \right\}. \end{aligned}$$

As before, we write  $R_t^{ll}, R_t^{lr}, R_t^{rl}$  and  $R_t^{rr}$  as shorthand when  $k_1, k_2$  are fixed. Conditional on  $N_n(R_t)$ , the samples falling into the hyper-rectangle  $R_t$  are uniformly distributed in  $R_t$ . Therefore we know from Chernoff's inequality that

$$\mathbb{P}\left(\left|\frac{N_n(R_t^{ll})}{N_n(R_t)} - \frac{1}{4}\right| \geq \frac{1}{16}\right) \leq 2 \exp\left(-\frac{N_n(R_t)}{48}\right)$$

for any  $k_1$  and  $k_2$ , and that the same results hold for  $R_t^{lr}, R_t^{rl}$  and  $R_t^{ll}$  as well. Let

$$B_2 = \left\{ \max_{\omega \in \{ll, lr, rl, rr\}} \left| \frac{N_n(R_t^\omega(k_1, k_2))}{N_n(R_t)} - \frac{1}{4} \right| \leq \frac{1}{16}, \text{ for all } 1 \leq t \leq 2^{d_n-1}, 2 \leq k_1 < k_2 \leq p \right\}.$$

Then

$$\mathbb{P}(B_2^c) \leq 2^{d_n} p^2 \exp\left(-\frac{N_n(R_t)}{48}\right), \quad (29)$$

and

$$\mathbb{P}(B_1 \cap B_2) \geq 1 - 2^{d_n+1} p^2 \exp\left(-\frac{N_n(R_t)}{48}\right) \geq 1 - 2^{d_n+1} p^2 \exp\left(-\frac{m_n}{18}\right) \geq \frac{8}{9} \quad (30)$$

for  $n$  large enough (under the condition that  $m_n \geq 36 \log p + 18 \log n$ ). Conditional on the event  $B_2$ ,

$$N_n(R_t^l) \geq N_n(R_t^{ll}) + N_n(R_t^{lr}) \geq \frac{3}{16} N_n(R_t) + \frac{3}{16} N_n(R_t) \geq \frac{3}{8} N_n(R_t),$$

for any  $1 \leq t \leq 2^{d_n-1}$  and  $2 \leq k \leq p$ , and the same holds for  $N_n(R_t^r)$ . Therefore,

$$\text{Var}(\eta_k) = \frac{1}{N_n(R_t^l)} + \frac{1}{N_n(R_t^r)} \geq \frac{3}{4N_n(R_t)} \quad (31)$$

$$\text{Cov}(\eta_{k_1}, \eta_{k_2}) = \frac{1}{N_n(R_t^{ll})} + \frac{1}{N_n(R_t^{rr})} - \frac{1}{N_n(R_t^{lr})} - \frac{1}{N_n(R_t^{rl})} \leq \frac{1}{4N_n(R_t)}. \quad (32)$$

Consider  $\tilde{\eta}_2, \dots, \tilde{\eta}_p$  with

$$\mathbb{E}\tilde{\eta}_k = 0, \text{Var}(\tilde{\eta}_k) = \frac{3}{4N_n(R_t)}$$

and

$$\text{Cov}(\tilde{\eta}_{k_1}, \tilde{\eta}_{k_2}) = \frac{1}{4N_n(R_t)}.$$

Then conditional on  $B_1 \cap B_2$ , by Sudakov-Fernique lemma, we have

$$\mathbb{E}_\epsilon [\max_k \eta_k | B_1 \cap B_2] \geq \mathbb{E} \max_k \tilde{\eta}_k \geq \sqrt{\frac{\log p}{N_n(R_t)}} \geq \sqrt{\frac{3 \log p}{32m_n}},$$

and the lower bound

$$\min\{N_n(R_t^l), N_n(R_t^r)\} \geq \frac{3}{8} N_n(R_t) \geq m_n,$$

for any  $k, t$ . where the last inequality follows from Equation (28). Therefore, conditional on  $B_1 \cap B_2$  the minimum leaf size is lower bounded by  $m_n$ . Finally

$$\begin{aligned} \mathbb{E}_{X, \epsilon} \left[ \sup_{T \in \mathcal{T}_n(m_n)} G_0(T) \right] &\geq \mathbb{E}_{X, \epsilon} \left[ \sup_{T \in \mathcal{T}_n(m_n)} G_0(T) \mathbb{1}_{B_1 \cap B_2} \right] \\ &\geq \mathbb{E}_X \left[ \sum_t \frac{N_n(R_t)}{n} \mathbb{E}_\epsilon \left[ \max_k \Delta_{\mathcal{I}}(R_t, k) \mathbb{1}_{B_1 \cap B_2} \right] \right] \\ &\geq \mathbb{E}_X \sum_t \frac{N_n(R_t)}{n} \left( \frac{3}{8} \right)^2 (\mathbb{E}_\epsilon \max_k \eta_k^2 \mathbb{1}_{B_1 \cap B_2}) \\ &\geq \frac{9}{64} \frac{3 \log p}{32m_n} \mathbb{P}(B_1 \cap B_2) \\ &\geq \frac{1}{80} \frac{\log p}{m_n} \end{aligned} \tag{33}$$

when  $n$  is large enough, and the lower bound is proved. This concludes the whole proof.  $\square$

*Proof of Proposition 1.* For simplicity, here we only present the proof for a single tree  $T$ . The case of multiple trees is straightforward. Recall that  $t^{\text{left}}$  and  $t^{\text{right}}$  are the left and right children of the node  $t$ . Based on (4), MDI at the node  $t$  is

$$\begin{aligned} \frac{N_n(t)}{|\mathcal{D}(T)|} \Delta_{\mathcal{I}}(t) &= \frac{1}{|\mathcal{D}(T)|} \sum_{i \in \mathcal{D}(T)} [y_i - \mu_n(t)]^2 \mathbb{1}(\mathbf{x}_i \in R_t) \\ &\quad - [y_i - \mu_n(t^{\text{left}})]^2 \mathbb{1}(\mathbf{x}_i \in R_{t^{\text{left}}}) - [y_i - \mu_n(t^{\text{right}})]^2 \mathbb{1}(\mathbf{x}_i \in R_{t^{\text{right}}}). \end{aligned} \tag{34}$$

Because  $\mathbb{1}(\mathbf{x}_i \in R_t) = \mathbb{1}(\mathbf{x}_i \in R_{t^{\text{right}}}) + \mathbb{1}(\mathbf{x}_i \in R_{t^{\text{left}}})$ , the above term becomes

$$\begin{aligned} &\frac{1}{|\mathcal{D}(T)|} \sum_{i \in \mathcal{D}(T)} ((y_i - \mu_n(t))^2 - (y_i - \mu_n(t^{\text{left}}))^2) \mathbb{1}(\mathbf{x}_i \in R_{t^{\text{left}}}) \\ &\quad + ((y_i - \mu_n(t))^2 - (y_i - \mu_n(t^{\text{right}}))^2) \mathbb{1}(\mathbf{x}_i \in R_{t^{\text{right}}}) \\ &= \frac{1}{|\mathcal{D}(T)|} \sum_{i \in \mathcal{D}(T)} (\mu_n(t^{\text{left}}) - \mu_n(t))(2y_i - \mu_n(t) - \mu_n(t^{\text{left}})) \mathbb{1}(\mathbf{x}_i \in R_{t^{\text{left}}}) \\ &\quad + (\mu_n(t^{\text{right}}) - \mu_n(t))(2y_i - \mu_n(t) - \mu_n(t^{\text{right}})) \mathbb{1}(\mathbf{x}_i \in R_{t^{\text{right}}}). \end{aligned} \tag{35}$$

Since  $\sum_{i \in \mathcal{D}(T)} y_i \mathbb{1}(\mathbf{x}_i \in t^{\text{left}}) = N_n(t^{\text{left}}) \mu_n(t^{\text{left}})$ , we know  $\sum_{i \in \mathcal{D}(T)} (y_i - \mu_n(t^{\text{left}})) \mathbb{1}(\mathbf{x}_i \in R_{t^{\text{left}}}) = 0$ . Similar equations hold for the right child  $t^{\text{right}}$ , too. Then (35) reduces to

$$\frac{1}{|\mathcal{D}(T)|} \sum_{i \in \mathcal{D}(T)} (\mu_n(t^{\text{left}}) - \mu_n(t))(y_i - \mu_n(t)) \mathbb{1}(\mathbf{x}_i \in R_{t^{\text{left}}}) \tag{36}$$

$$+ (\mu_n(t^{\text{right}}) - \mu_n(t))(y_i - \mu_n(t)) \mathbb{1}(\mathbf{x}_i \in R_{t^{\text{right}}}) \tag{37}$$

Because of the definitions of  $\mu_n(t^{\text{left}})$ ,  $\mu_n(t^{\text{right}})$ , and  $\mu_n(t)$ , we know

$$N_n(t^{\text{left}}) \mu_n(t^{\text{left}}) + N_n(t^{\text{right}}) \mu_n(t^{\text{right}}) = N_n(t) \mu_n(t). \tag{38}$$

That implies  $\sum_{i \in \mathcal{D}^{(T)}} (\mu_n(t^{\text{left}}) - \mu_n(t)) \mathbb{1}(\mathbf{x}_i \in R_{t^{\text{left}}}) + (\mu_n(t^{\text{right}}) - \mu_n(t)) \mathbb{1}(\mathbf{x}_i \in R_{t^{\text{right}}}) = 0$ . Using this equation, (37) can be written as

$$\frac{1}{|\mathcal{D}^{(T)}|} \sum_{i \in \mathcal{D}^{(T)}} (\mu_n(t^{\text{left}}) - \mu_n(t)) y_i \mathbb{1}(\mathbf{x}_i \in \mathbb{R}_{t^{\text{left}}}) + (\mu_n(t^{\text{right}}) - \mu_n(t)) y_i \mathbb{1}(\mathbf{x}_i \in \mathbb{R}_{t^{\text{right}}}). \quad (39)$$

In summary, we have shown that:

$$\frac{N_n(t)}{|\mathcal{D}^{(T)}|} \Delta_{\mathcal{I}}(t) = \frac{1}{|\mathcal{D}^{(T)}|} \sum_{i \in \mathcal{D}^{(T)}} (\mu_n(t^{\text{left}}) - \mu_n(t)) y_i \mathbb{1}(\mathbf{x}_i \in \mathbb{R}_{t^{\text{left}}}) + (\mu_n(t^{\text{right}}) - \mu_n(t)) y_i \mathbb{1}(\mathbf{x}_i \in \mathbb{R}_{t^{\text{right}}}). \quad (40)$$

Since the MDI of the feature  $k$  is the sum of  $\frac{N_n(t)}{|\mathcal{D}^{(T)}|} \Delta_{\mathcal{I}}(t)$  across all inner nodes such that  $v(t) = k$ , we have

$$\begin{aligned} & \sum_{t \in I(T)} \frac{N_n(t)}{|\mathcal{D}^{(T)}|} \Delta_{\mathcal{I}}(t) \mathbb{1}(v(t) = k) \\ &= \sum_{t \in I(T): v(t) = k} \frac{1}{|\mathcal{D}^{(T)}|} \sum_{i \in \mathcal{D}^{(T)}} (\mu_n(t^{\text{left}}) - \mu_n(t)) y_i \mathbb{1}(\mathbf{x}_i \in \mathbb{R}_{t^{\text{left}}}) + (\mu_n(t^{\text{right}}) - \mu_n(t)) y_i \mathbb{1}(\mathbf{x}_i \in \mathbb{R}_{t^{\text{right}}}) \\ &= \frac{1}{|\mathcal{D}^{(T)}|} \sum_{i \in \mathcal{D}^{(T)}} \left[ \sum_{t \in I(T): v(t) = k} (\mu_n(t^{\text{left}}) - \mu_n(t)) \mathbb{1}(\mathbf{x}_i \in \mathbb{R}_{t^{\text{left}}}) + (\mu_n(t^{\text{right}}) - \mu_n(t)) \mathbb{1}(\mathbf{x}_i \in \mathbb{R}_{t^{\text{right}}}) \right] y_i \\ &= \frac{1}{|\mathcal{D}^{(T)}|} \sum_{i \in \mathcal{D}^{(T)}} f_{T,k}(\mathbf{x}_i) y_i. \end{aligned}$$

That completes the proof.  $\square$



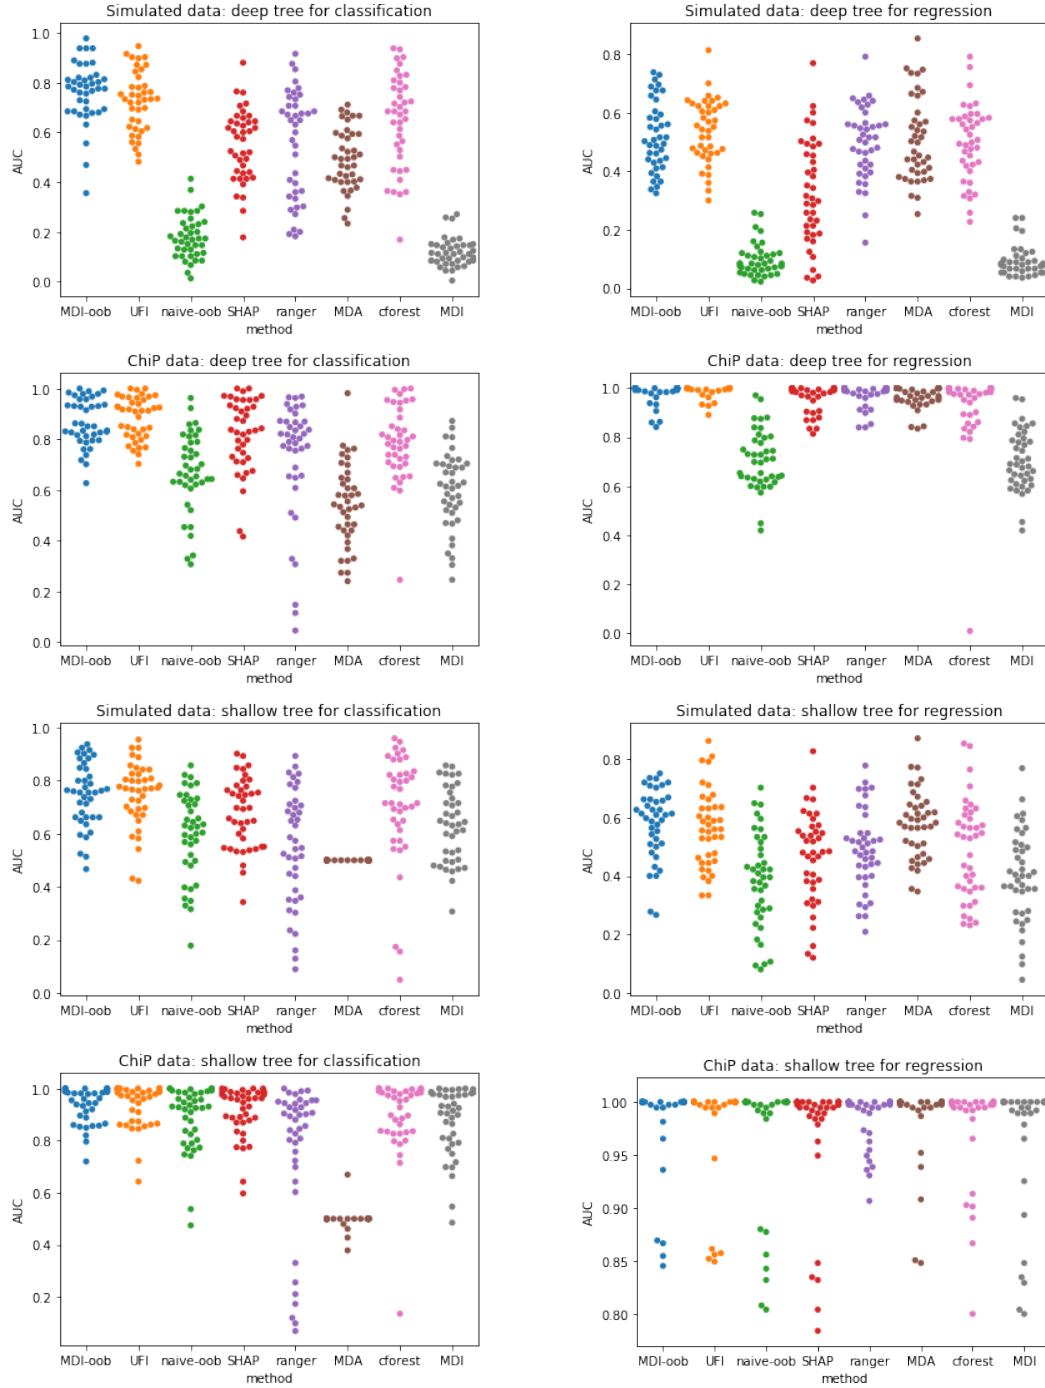

Figure 4: The beeswarm plots for different simulation settings.

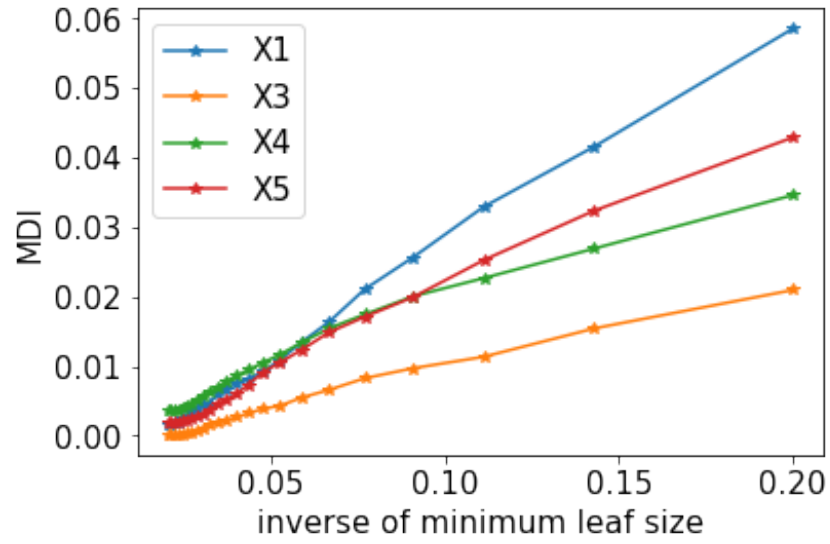

Figure 5: MDI against inverse min leaf size. This is coherent with our theoretical analysis as MDI is proportional to the inverse of minimum leaf size.

|         | Deep tree (min leaf size = 1) |             |             | Shallow tree(min leaf size = 100) |             |             |
|---------|-------------------------------|-------------|-------------|-----------------------------------|-------------|-------------|
|         | C                             | Simulated   | ChIP        | C                                 | Simulated   | ChIP        |
|         |                               | R           | R           |                                   | R           | R           |
| MDI-oob | 0.762(.019)                   | 0.519(.018) | 0.865(.015) | 0.748(.019)                       | 0.581(.019) | 0.939(.011) |
| SHAP    | 0.548(.023)                   | 0.325(.028) | 0.821(.023) | 0.677(.021)                       | 0.462(.025) | 0.912(.015) |
| ranger  | 0.555(.034)                   | 0.496(.019) | 0.726(.038) | 0.549(.034)                       | 0.487(.022) | 0.755(.045) |
| MDA     | 0.493(.019)                   | 0.507(.022) | 0.542(.025) | 0.500(.000)                       | 0.577(.018) | 0.985(.004) |
| cforest | 0.649(.029)                   | 0.499(.020) | 0.788(.023) | 0.701(.033)                       | 0.488(.026) | 0.498(.006) |
| MDI     | 0.118(.009)                   | 0.092(.008) | 0.597(.023) | 0.632(.022)                       | 0.397(.025) | 0.900(.024) |
|         |                               |             |             |                                   |             | 0.979(.007) |
|         |                               |             |             |                                   |             | 0.971(.009) |

"C" stands for classification, "R" stands for regression.
